# Supplementary material for: Cyclopentene ring effects in cyanine dyes: a handle to fine-tune photophysical properties
Source: Royal Society of Chemistry journal article supplement (doi:10.1039/d3cp05219b), 2024-01-01
Supplement: d3cp05219b1.pdf [file d3cp05219b1.pdf]

## Supporting Information:

Cyclopentene ring effects in cyanine dyes: a handle to fine-tune photophysical properties

Natalia P. Neme <sup>1,2</sup>, Thomas L.C Jansen <sup>1</sup>, and Remco W.A. Havenith <sup>1,2,3\*</sup>

<sup>1</sup> *Zernike Institute for Advanced Materials, University of Groningen, 9747 AG Groningen, The Netherlands*

<sup>2</sup> *Stratingh Institute for Chemistry, University of Groningen, 9747 AG Groningen, The Netherlands*

<sup>3</sup> *Department of Chemistry, Ghent University, B-9000 Gent, Belgium*

\* Email: r.w.a.havenith@rug.nl

# Contents

|                                                                                                                                   |             |
|-----------------------------------------------------------------------------------------------------------------------------------|-------------|
| <b>List of Figures</b>                                                                                                            | <b>S-2</b>  |
| <b>1 Coefficient of determination for molecules 2(n)</b>                                                                          | <b>S-5</b>  |
| <b>2 Coefficient of determination for molecules 6(n) and 8(n)</b>                                                                 | <b>S-6</b>  |
| <b>3 Theoretical absorbance at CC2 and TD-DFT</b>                                                                                 | <b>S-7</b>  |
| <b>4 Theoretical absorbance spectra for molecules 3(n) and 4(n)</b>                                                               | <b>S-8</b>  |
| <b>5 Theoretical absorbance spectra for 2(n) with implicit solvation</b>                                                          | <b>S-10</b> |
| <b>6 Conformation analysis</b>                                                                                                    | <b>S-13</b> |
| <b>7 Benchmark</b>                                                                                                                | <b>S-18</b> |
| 7.1 $\omega$ B97X/TZP . . . . .                                                                                                   | S-18        |
| 7.2 CAM-B3LYP/TZP . . . . .                                                                                                       | S-21        |
| 7.3 B2PLYP/def2-TZVP/def2-TZVP/C . . . . .                                                                                        | S-23        |
| 7.4 B3LYP/AUG/ATZP . . . . .                                                                                                      | S-27        |
| 7.5 $\omega$ B97X/AUG/ATZP . . . . .                                                                                              | S-29        |
| <b>8 Vertical TD-DFT excitation and main orbitals electronic transitions for molecules 1-8(n) in gas phase at B3LYP/TZP level</b> | <b>S-32</b> |

## List of Figures

|                                                                                                                                                             |     |
|-------------------------------------------------------------------------------------------------------------------------------------------------------------|-----|
| S1 Linear regression and coefficient of determination for molecules <b>2(n)</b> with n=1 to 8 in gas phase at TD-DFT/B3LYP/TZP . . . . .                    | S-5 |
| S2 Linear regression and coefficient of determination for molecules <b>6(n)</b> (blue) and <b>8(n)</b> (red) with n=1 to 6 in gas phase at TD-DFT/B3LYP/TZP | S-6 |

|     |                                                                                                                                                                                                                              |      |
|-----|------------------------------------------------------------------------------------------------------------------------------------------------------------------------------------------------------------------------------|------|
| S3  | Vertical excitation transitions S0-S1 for molecules <b>6</b> (n) and <b>8</b> (n) with n=1 to 6. The S0 were optimized using at DFT level using B3LYP/TZP. CC2 transitions were calculated with def-TZVP basis set . . . . . | S-7  |
| S4  | Theoretical absorbance spectra for molecules <b>3</b> (n) with n=1 to 4 in gas phase at TD-DFT/B3LYP/TZP level with 5 excited states. The inset shows the basic structure for the molecule. . . . .                          | S-8  |
| S5  | Theoretical absorbance spectra for molecules <b>4</b> (n) with n=1 to 4 in gas phase at TD-DFT/B3LYP/TZP level with 5 excited states. The inset shows the basic structure for the molecule. . . . .                          | S-9  |
| S6  | Theoretical absorbance spectra for molecules <b>2</b> (n) with n=1 to 4 in solvent ODCB at TD-DFT/B3LYP/TZP level with 5 excited states. The inset shows the basic structure for the molecule. . . . .                       | S-10 |
| S7  | (a) trans-trans and (b) trans-cis structure for molecules <b>2</b> (n). . . . .                                                                                                                                              | S-13 |
| S8  | Energy difference between different conformers. For the first group (n=odd), trans-trans conformer is more stable. For the second group (n=even), trans-cis conformer is more stable. . . . .                                | S-13 |
| S9  | Main absorption peak for all trans-trans and trans-cis conformers . . .                                                                                                                                                      | S-14 |
| S10 | Theoretical absorbance spectra for molecules <b>8</b> (n) with n=1 to 6 in gas-phase at TD-DFT/ $\omega$ 97BX/TZP level with 5 excited states. . . .                                                                         | S-18 |
| S11 | Theoretical absorbance spectra for molecules <b>8</b> (n) with n=1 to 6 in gas-phase at TD-DFT/CAM-B3LYP/TZP . . . . .                                                                                                       | S-21 |
| S12 | Theoretical absorbance spectra for molecules <b>6</b> (n) with n=1 to 6 in gas-phase at TD-DFT/B2PLYP/def2-TZVP/def2-TZVP/C . . . . .                                                                                        | S-23 |
| S13 | Theoretical absorbance spectra for molecules <b>8</b> (n) with n=1 to 6 in gas-phase at TD-DFT/B2PLYP/def2-TZVP/def2-TZVP/C . . . . .                                                                                        | S-25 |
| S14 | Theoretical absorbance spectra for molecules <b>8</b> (n) with n=1 to 6 in gas-phase at TD-DFT/B3LYP/AUG/ATZP . . . . .                                                                                                      | S-27 |

S15 Theoretical absorbance spectra for molecules **8**(n) with n=1 to 6 in  
gas-phase at TD-DFT/ $\omega$ B97X/AUG/ATZP . . . . . S-29

# 1 Coefficient of determination for molecules $2(n)$

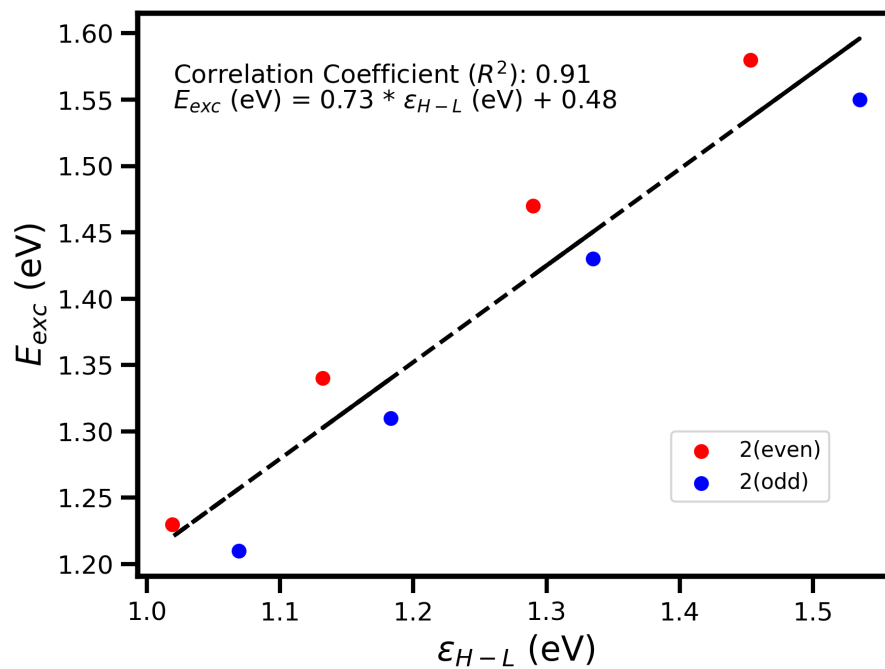

Figure S1: Linear regression and coefficient of determination for molecules  $2(n)$  with  $n=1$  to 8 in gas phase at TD-DFT/B3LYP/TZP

## 2 Coefficient of determination for molecules **6**(n) and **8**(n)

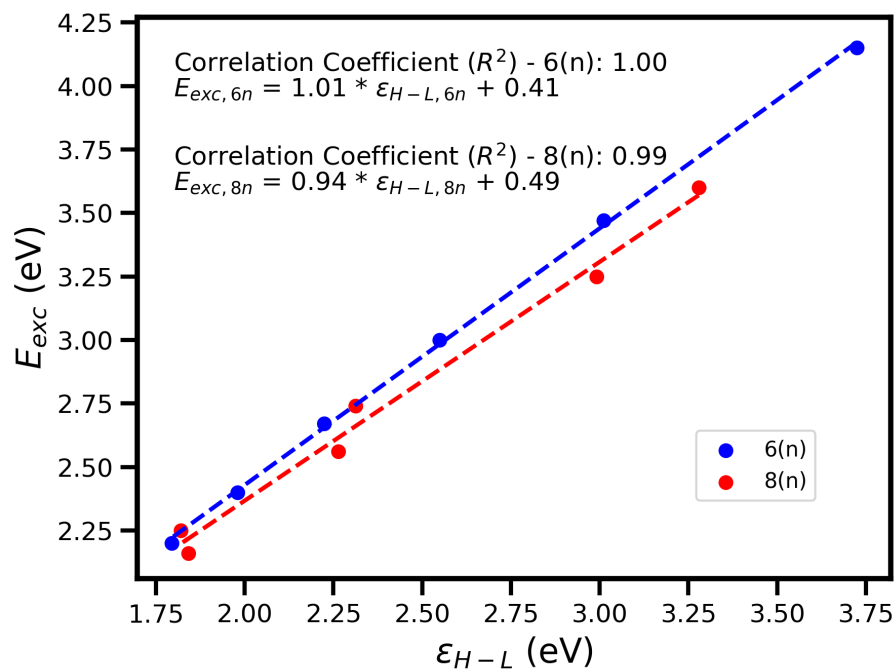

Figure S2: Linear regression and coefficient of determination for molecules **6**(n) (blue) and **8**(n) (red) with n=1 to 6 in gas phase at TD-DFT/B3LYP/TZP

### 3 Theoretical absorbance at CC2 and TD-DFT

Table S1: Table comparing the vertical excitation transitions S0-S1 at CC2 and TD-DFT level for molecules **6**(n) with n=1 to 4. For both calculations, the S0 were optimized using at DFT level using B3LYP/TZP. CC2 transitions were calculated with def-TZVP basis set, and TD-DFT using B3LYP/TZP.

|              | CC2 (eV) | $f_{osc}$ | $E_{exc}$ (eV) | $f_{osc}$ |
|--------------|----------|-----------|----------------|-----------|
| <b>6</b> (1) | 3.72     | 1.33      | 4.15           | 1.16      |
| <b>6</b> (2) | 3.03     | 1.81      | 3.47           | 1.59      |
| <b>6</b> (3) | 2.56     | 1.93      | 3.00           | 2.03      |
| <b>6</b> (4) | 2.24     | 2.78      | 2.67           | 2.47      |

Table S2: Table comparing the vertical excitation transitions S0-S1 at CC2 and TD-DFT level for molecules **8**(n) with n=1 to 4. For both calculations, the S0 were optimized using at DFT level using B3LYP/TZP. CC2 transitions were calculated with def-TZVP basis set, and TD-DFT using B3LYP/TZP.

|              | CC2 (eV) | $f_{osc}$ | $E_{exc}$ (eV) | $f_{osc}$ |
|--------------|----------|-----------|----------------|-----------|
| <b>8</b> (1) | 3.32     | 0.95      | 3.60           | 0.74      |
| <b>8</b> (2) | 2.91     | 1.46      | 3.25           | 1.11      |
| <b>8</b> (3) | 2.41     | 1.93      | 2.74           | 1.57      |
| <b>8</b> (4) | 2.20     | 2.45:     | 2.56           | 2.06      |

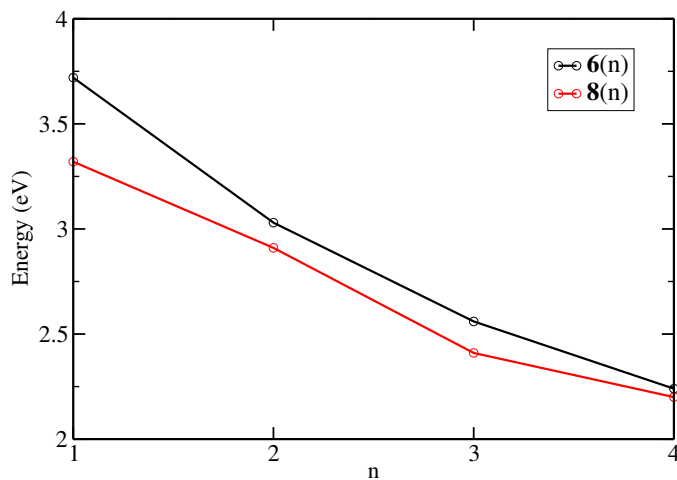

Figure S3: Vertical excitation transitions S0-S1 for molecules **6**(n) and **8**(n) with n=1 to 6. The S0 were optimized using at DFT level using B3LYP/TZP. CC2 transitions were calculated with def-TZVP basis set

## 4 Theoretical absorbance spectra for molecules $\mathbf{3(n)}$ and $\mathbf{4(n)}$

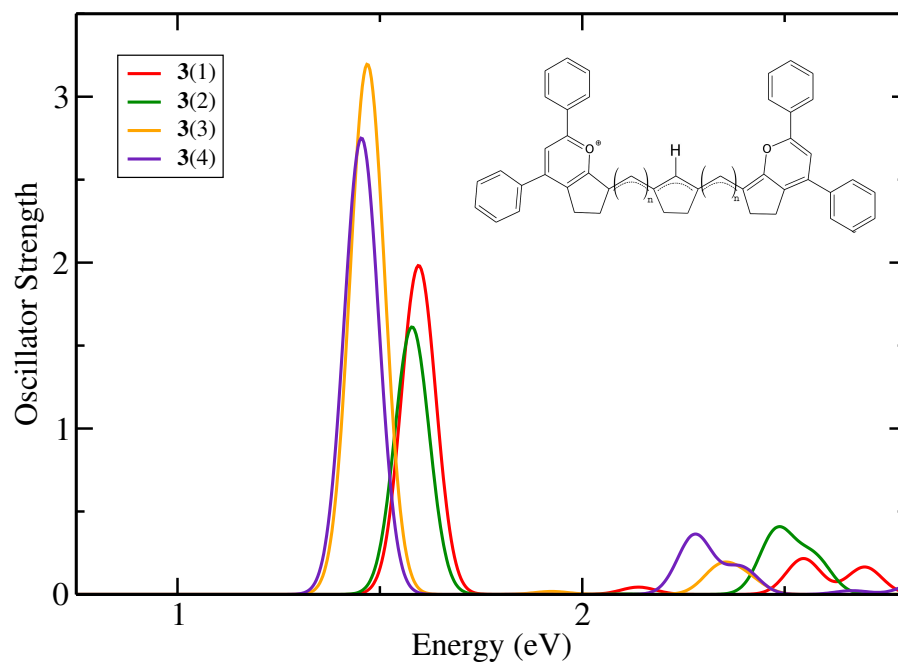

Figure S4: Theoretical absorbance spectra for molecules  $\mathbf{3(n)}$  with  $n=1$  to  $4$  in gas phase at TD-DFT/B3LYP/TZP level with 5 excited states. The inset shows the basic structure for the molecule.

Table S3: Vertical excitation transitions S0-S1 for molecule  $\mathbf{3(n)}$  with  $n=1$  to  $4$  at TD-DFT/B3LYP/TZP.

|                 | $E_{exc}$ (eV) | $f_{osc}$ |
|-----------------|----------------|-----------|
| $\mathbf{3(1)}$ | 1.59           | 1.98      |
| $\mathbf{3(2)}$ | 1.58           | 1.61      |
| $\mathbf{3(3)}$ | 1.47           | 3.19      |
| $\mathbf{3(4)}$ | 1.45           | 2.75      |



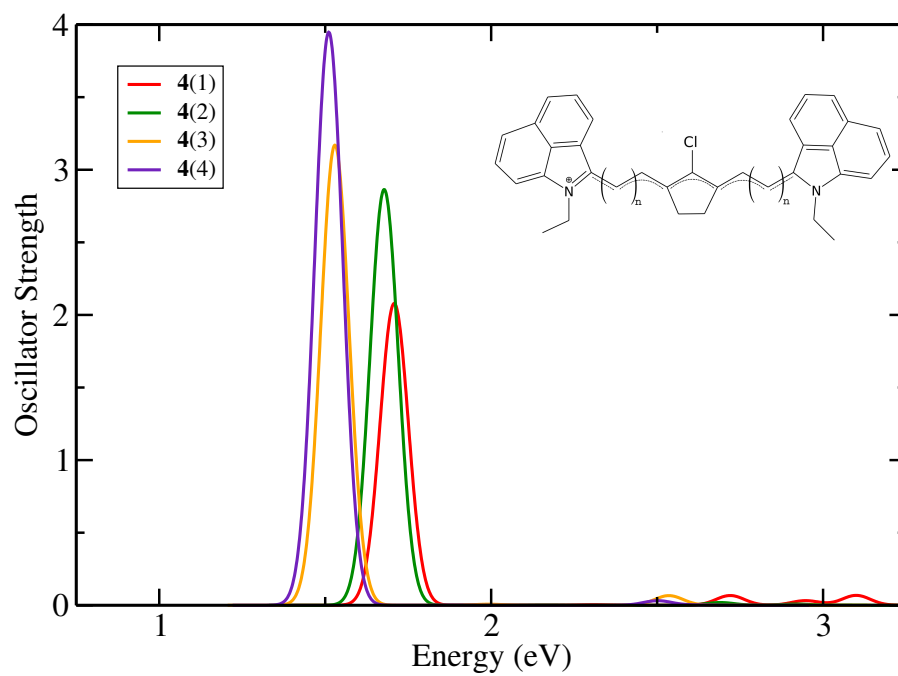

Figure S5: Theoretical absorbance spectra for molecules  $4(n)$  with  $n=1$  to  $4$  in gas phase at TD-DFT/B3LYP/TZP level with 5 excited states. The inset shows the basic structure for the molecule.

Table S4: Vertical excitation transitions S0-S1 for molecules  $4(n)$  with  $n=1$  to  $4$  in solvent ODCB at TD-DFT/B3LYP/TZP.

|             | $E_{exc}$ (eV) | $f_{osc}$ |
|-------------|----------------|-----------|
| <b>4(1)</b> | 1.71           | 2.07      |
| <b>4(2)</b> | 1.68           | 2.86      |
| <b>4(3)</b> | 1.53           | 3.17      |
| <b>4(4)</b> | 1.51           | 3.94      |

## 5 Theoretical absorbance spectra for **2**(n) with implicit solvation

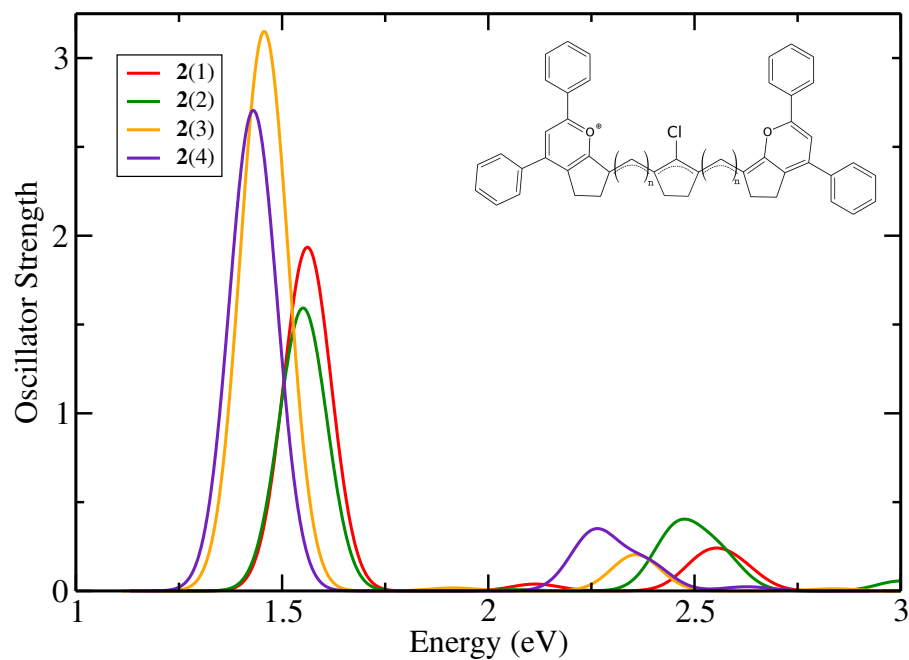

Figure S6: Theoretical absorbance spectra for molecules **2**(n) with n=1 to 4 in solvent ODCB at TD-DFT/B3LYP/TZP level with 5 excited states. The inset shows the basic structure for the molecule.

Table S5: Vertical excitation transitions S0-S1 for molecules **2**(n) with n=1 to 4 in solvent ODCB at TD-DFT/B3LYP/TZP.

|              | $E_{exc}$ (eV) | $f_{osc}$ |
|--------------|----------------|-----------|
| <b>2</b> (1) | 1.56           | 1.93      |
| <b>2</b> (2) | 1.55           | 1.59      |
| <b>2</b> (3) | 1.45           | 3.15      |
| <b>2</b> (4) | 1.43           | 2.70      |

Table S6: Vertical excitation transitions (eV), main orbitals electronic transitions and oscillator strength ( $f_{osc}$ ) for molecules **2**(n) with n=1 to 4 in solvent ODCB at TD-DFT/B3LYP/TZP level. The main orbitals involved in the first excitation of each molecule are its HOMO and LUMO.

|               | State                          | Transition (>10%)    | $E_{exc}$ (eV) | Osc.Stren. |
|---------------|--------------------------------|----------------------|----------------|------------|
| <b>2(1)</b>   | 1                              | <b>175-176 (96%)</b> | 1.56           | 1.93       |
|               | 2                              | 175-177 (85%)        | 2.11           | 0.04       |
|               |                                | 174-176 (13%)        |                |            |
|               | 3                              | 175-178 (94%)        | 2.53           | 0.18       |
|               | 4                              | 174-176 (80%)        | 2.61           | 0.12       |
| 175-177 (10%) |                                |                      |                |            |
| 5             | 175-179 (70%)<br>172-176 (20%) | 3.14                 | 0.40           |            |
| <b>2(2)</b>   | 1                              | <b>182-183 (96%)</b> | 1.55           | 1.59       |
|               | 2                              | 182-184 (70%)        | 2.06           | 0.00       |
|               |                                | 181-183 (29%)        |                |            |
|               | 3                              | 181-183 (65%)        | 2.46           | 0.35       |
|               |                                | 182-184 (24%)        |                |            |
| 4             | 182-185 (92%)                  | 2.56                 | 0.20           |            |
| 5             | 182-186 (79%)                  | 3.00                 | 0.05           |            |
| <b>2(3)</b>   | 1                              | <b>189-190 (96%)</b> | 1.46           | 3.15       |
|               | 2                              | 189-191 (70%)        | 1.91           | 0.02       |
|               |                                | 188-190 (29%)        |                |            |
|               | 3                              | 189-192 (91%)        | 2.35           | 0.13       |
|               | 4                              | 188-190 (61%)        | 2.37           | 0.07       |
| 189-191 (23%) |                                |                      |                |            |
| 5             | 187-190 (60%)<br>188-191 (38%) | 2.84                 | 0.01           |            |

|             |               |                      |      |      |
|-------------|---------------|----------------------|------|------|
| <b>2(4)</b> | 1             | <b>196-197 (96%)</b> | 1.43 | 2.70 |
|             | 2             | 196-198 (57%)        | 1.84 | 0.00 |
|             |               | 195-197 (43%)        |      |      |
|             | 3             | 195-197 (50%)        | 2.26 | 0.33 |
|             |               | 196-198 (36%)        |      |      |
| 4           | 196-199 (89%) | 2.38                 | 0.16 |      |
| 5           | 195-198 (66%) | 2.63                 | 0.02 |      |
|             | 194-197 (30%) |                      |      |      |

## 6 Conformation analysis

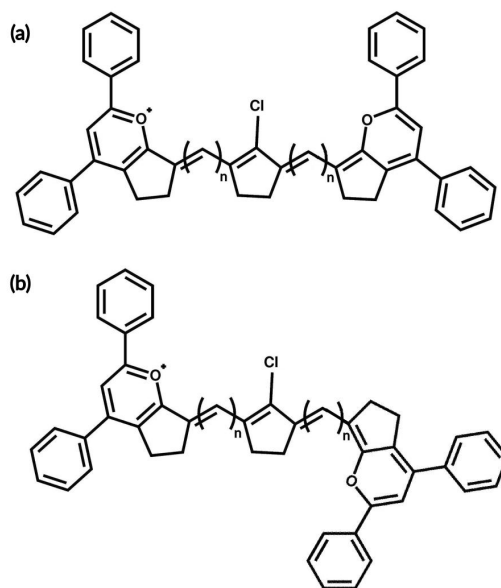

Figure S7: (a) trans-trans and (b) trans-cis structure for molecules  $2(n)$ .

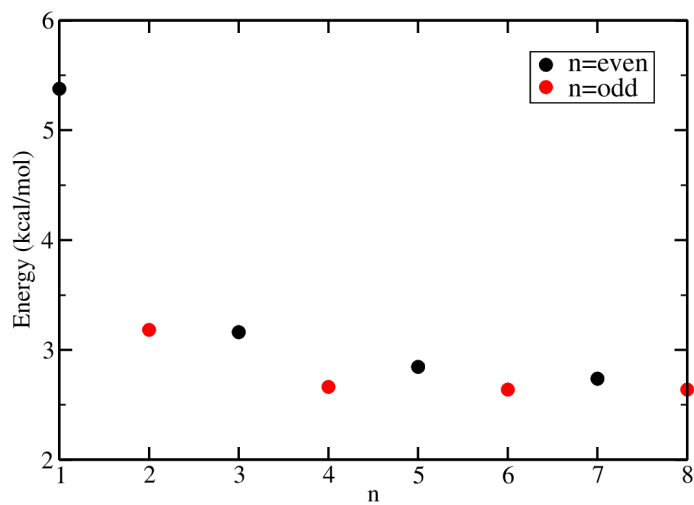

Figure S8: Energy difference between different conformers. For the first group ( $n$ =odd), trans-trans conformer is more stable. For the second group ( $n$ =even), trans-cis conformer is more stable.

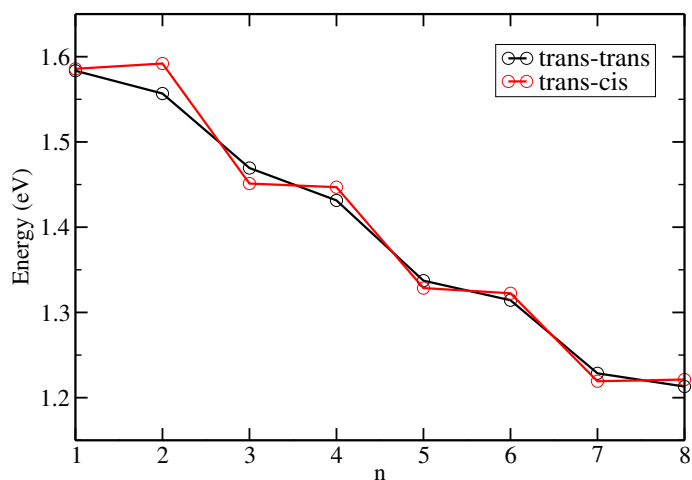

Figure S9: Main absorption peak for all trans-trans and trans-cis conformers

Table S7: Vertical excitation transitions (eV), main orbitals electronic transitions and oscillator strength ( $f_{osc}$ ) for molecules **2**(n) trans-cis, with n=1 to 8 in gas phase at TD-DFT/B3LYP/TZP level. The main orbitals involved in the first excitation of each molecule are its HOMO and LUMO.

|             |               | <b>trans-cis</b>            |                |           |
|-------------|---------------|-----------------------------|----------------|-----------|
|             | <b>State</b>  | <b>Transition (&gt;10%)</b> | $E_{exc}$ (eV) | $f_{osc}$ |
| <b>2(1)</b> | 1             | <b>175-176 (97%)</b>        | 1.59           | 1.72      |
|             | 2             | 175-177 (82%)               | 2.18           | 0.01      |
|             |               | 174-176 (16%)               |                |           |
|             | 3             | 175-178 (79%)               | 2.56           | 0.09      |
|             |               | 174-176 (11%)               |                |           |
| 4           | 174-176 (66%) | 2.60                        | 0.10           |           |
|             | 175-178 (14%) |                             |                |           |
|             | 175-177 (10%) |                             |                |           |
| 5           | 173-176 (86%) | 3.10                        | 0.16           |           |
| <b>2(2)</b> | 1             | <b>182-183 (96%)</b>        | 1.59           | 2.23      |
|             | 2             | 182-184 (71%)               | 2.10           | 0.01      |
|             |               | 181-183 (28%)               |                |           |

|             |             |                                                 |                      |      |
|-------------|-------------|-------------------------------------------------|----------------------|------|
|             | 3           | 181-183 (66%)<br>182-184 (23%)                  | 2.48                 | 0.05 |
|             | 4           | 182-185 (92%)                                   | 2.58                 | 0.10 |
|             | 5           | 181-184 (53%)<br>180-183 (44%)                  | 3.01                 | 0.00 |
| <b>2(3)</b> | 1           | <b>189-190 (96%)</b>                            | 1.45                 | 2.62 |
|             | 2           | 189-191 (69%)<br>188-190 (30%)                  | 1.92                 | 0.00 |
|             | 3           | 189-192 (45%)<br>188-190 (31%)<br>189-191 (14%) | 2.35                 | 0.02 |
|             | 4           | 189-192 (46%)<br>188-190 (30%)                  | 2.36                 | 0.25 |
|             | 5           | 187-190 (62%)<br>188-191 (35%)                  | 2.84                 | 0.01 |
|             | <b>2(4)</b> | 1                                               | <b>196-197 (96%)</b> | 1.45 |
| 2           |             | 196-198 (57%)<br>195-197 (43%)                  | 1.85                 | 0.00 |
| 3           |             | 195-197 (49%)<br>196-198 (35%)<br>196-200 (11%) | 2.28                 | 0.04 |
| 4           |             | 196-199 (89%)                                   | 2.37                 | 0.16 |
| 5           |             | 195-198 (64%)<br>194-197 (32%)                  | 2.65                 | 0.02 |
| <b>2(5)</b> |             | 1                                               | <b>203-204 (96%)</b> | 1.33 |
|             | 2           | 203-205 (57%)<br>202-204 (42%)                  | 1.72                 | 0.00 |

|             |   |                                                 |      |      |
|-------------|---|-------------------------------------------------|------|------|
|             | 3 | 203-206 (50%)<br>202-204 (20%)<br>203-205 (16%) | 2.18 | 0.00 |
|             | 4 | 203-206 (37%)<br>202-204 (28%)<br>203-205 (18%) | 2.19 | 0.20 |
|             | 5 | 201-204 (56%)<br>202-205 (41%)                  | 2.50 | 0.01 |
| <b>2(6)</b> | 1 | <b>210-211 (96%)</b>                            | 1.32 | 4.37 |
|             | 2 | 209-211 (51%)<br>210-212 (48%)                  | 1.65 | 0.00 |
|             | 3 | 210-212 (43%)<br>209-211 (41%)<br>210-214 (11%) | 2.13 | 0.03 |
|             | 4 | 210-213 (85%)                                   | 2.20 | 0.08 |
|             | 5 | 209-212 (58%)<br>208-211 (39%)                  | 2.35 | 0.00 |
| <b>2(7)</b> | 1 | <b>217-218 (96%)</b>                            | 1.22 | 4.70 |
|             | 2 | 217-219 (50%)<br>216-218 (50%)                  | 1.54 | 0.00 |
|             | 3 | 217-220 (75%)<br>215-218 (13%)                  | 2.03 | 0.00 |
|             | 4 | 216-218 (38%)<br>217-219 (37%)<br>217-221 (13%) | 2.06 | 0.05 |
|             | 5 | 215-218 (52%)<br>216-219 (44%)                  | 2.21 | 0.01 |



|             |               |                      |      |          |
|-------------|---------------|----------------------|------|----------|
| <b>2(8)</b> | 1             | <b>224-225 (96%)</b> | 1.22 | 4.915.38 |
|             | 2             | 223-225 (55%)        | 1.50 | 0.00     |
|             |               | 224-226 (44%)        |      |          |
|             | 3             | 224-226 (47%)        | 2.01 | 0.02     |
|             |               | 223-225 (36%)        |      |          |
| 4           | 224-227 (77%) | 2.04                 | 0.03 |          |
|             | 223-226 (12%) |                      |      |          |
| 5           | 223-226 (51%) | 2.10                 | 0.00 |          |
|             | 222-225 (46%) |                      |      |          |

## 7 Benchmark

### 7.1 $\omega$ B97X/TZP

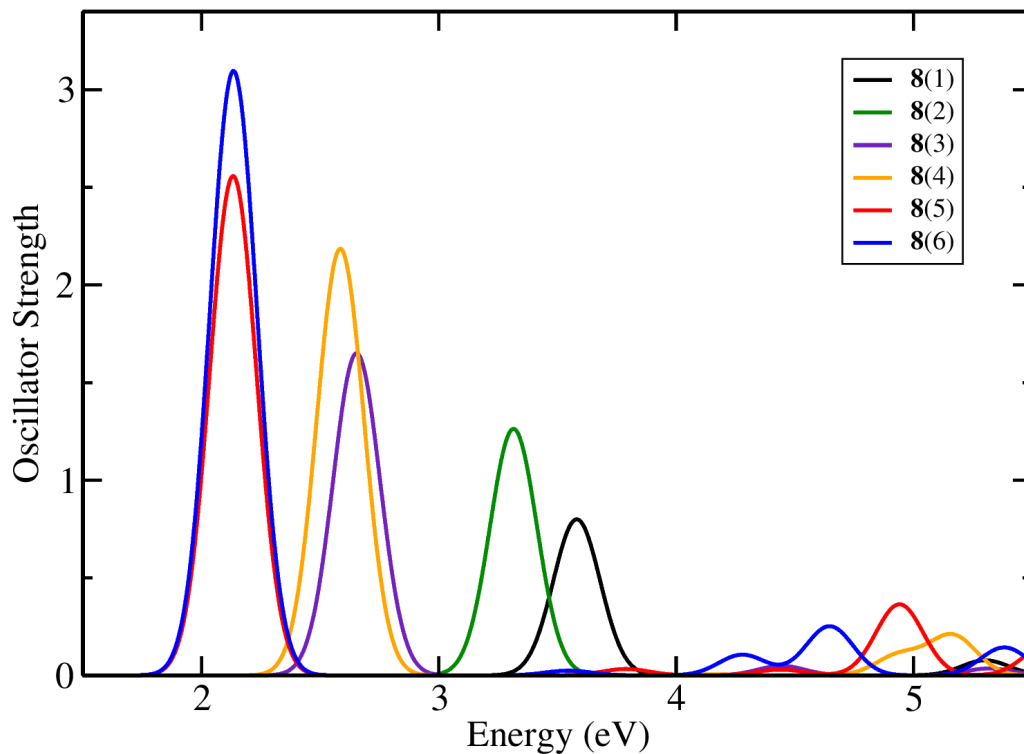

Figure S10: Theoretical absorbance spectra for molecules **8**(n) with n=1 to 6 in gas-phase at TD-DFT/ $\omega$ 97BX/TZP level with 5 excited states.

Table S8: Vertical excitation transitions (eV), main orbitals electronic transitions and oscillator strength ( $f_{osc}$ ) for molecules **8**(n) with n=1 to 6 in gas phase at TD-DFT/ $\omega$ 97BX/TZP level. The main orbitals involved in the first excitation of each molecule are its HOMO and LUMO.

|             | State | Transition (>10%)                         | $E_{exc}$ (eV) | $f_{osc}$ |
|-------------|-------|-------------------------------------------|----------------|-----------|
| <b>8(1)</b> | 1     | <b>41-42 (97%)</b>                        | 3.58           | 0.80      |
|             | 2     | 40-42 (95%)                               | 5.30           | 0.08      |
|             | 3     | 39-42 (97%)                               | 5.73           | 0.00      |
|             | 4     | 41-43 (52%)<br>41-46 (27%)<br>41-48 (11%) | 6.55           | 0.00      |

|             |   |                            |      |      |
|-------------|---|----------------------------|------|------|
|             | 5 | 41-44 (87%)                | 6.72 | 0.01 |
| <b>8(2)</b> | 1 | <b>48-49 (96%)</b>         | 3.31 | 1.26 |
|             | 2 | 47-49 (85%)                | 5.16 | 0.00 |
|             | 3 | 46-49 (94%)                | 5.79 | 0.16 |
|             | 4 | 45-49 (93%)                | 5.93 | 0.00 |
|             | 5 | 48-50 (76%)                | 5.97 | 0.12 |
| <b>8(3)</b> | 1 | <b>55-56 (96%)</b>         | 2.65 | 1.65 |
|             | 2 | 54-56 (90%)                | 4.44 | 0.05 |
|             | 3 | 55-57 (93%)                | 5.32 | 0.04 |
|             | 4 | 51-56 (94%)                | 5.44 | 0.00 |
|             | 5 | 53-56 (78%)                | 5.87 | 0.33 |
| <b>8(4)</b> | 1 | <b>62-63 (93%)</b>         | 2.58 | 2.19 |
|             | 2 | 61-63 (84%)                | 4.17 | 0.00 |
|             | 3 | 62-64 (85%)                | 4.94 | 0.10 |
|             | 4 | 60-63 (88%)                | 5.17 | 0.20 |
|             | 5 | 62-68 (41%)<br>61-64 (38%) | 6.17 | 0.14 |
| <b>8(5)</b> | 1 | <b>69-70 (93%)</b>         | 2.13 | 2.56 |
|             | 2 | 68-70 (88%)                | 3.79 | 0.03 |
|             | 3 | 69-71 (89%)                | 4.44 | 0.03 |
|             | 4 | 67-70 (80%)                | 4.94 | 0.36 |
|             | 5 | 69-72 (72%)<br>68-71 (11%) | 5.56 | 0.15 |
| <b>8(6)</b> | 1 | <b>76-77 (90%)</b>         | 2.13 | 3.09 |
|             | 2 | 75-77 (81%)<br>76-78 (11%) | 3.54 | 0.02 |

|  |   |                            |      |      |
|--|---|----------------------------|------|------|
|  | 3 | 76-78 (81%)<br>75-77 (10%) | 4.28 | 0.11 |
|  | 4 | 74-77 (78%)<br>75-78 (11%) | 4.65 | 0.25 |
|  | 5 | 75-78 (40%)<br>76-79 (37%) | 5.38 | 0.14 |

## 7.2 CAM-B3LYP/TZP

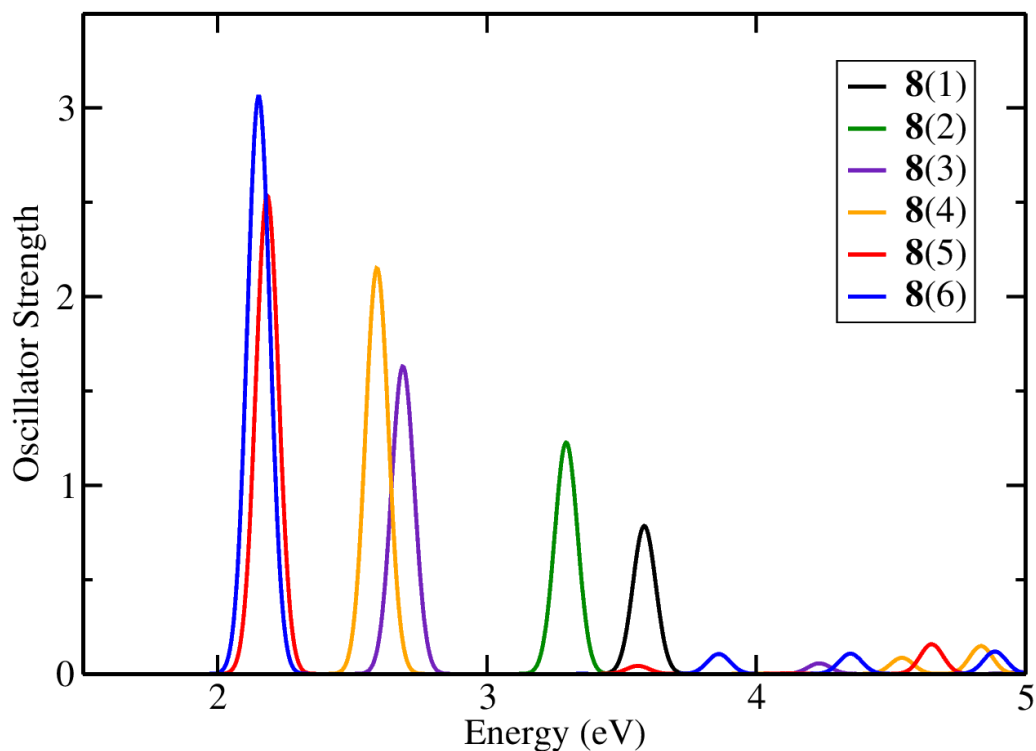

Figure S11: Theoretical absorbance spectra for molecules **8**(n) with n=1 to 6 in gas-phase at TD-DFT/CAM-B3LYP/TZP

Table S9: Vertical excitation transitions (eV), main orbitals electronic transitions and oscillator strength ( $f_{osc}$ ) for molecules **8**(n) with n=1 to 6 in gas phase at TD-DFT/CAM-B3LYP/TZP level. The main orbitals involved in the first excitation of each molecule are its HOMO and LUMO.

|              | State | Transition (>10%)  | $E_{exc}$ (eV) | $f_{osc}$ |
|--------------|-------|--------------------|----------------|-----------|
| <b>8</b> (1) | 1     | <b>41-42 (97%)</b> | 3.58           | 0.78      |
|              | 2     | 40-42 (97%)        | 5.09           | 0.08      |
|              | 3     | 39-42 (98%)        | 5.50           | 0.00      |
|              | 4     | 41-43 (90%)        | 5.97           | 0.00      |
|              | 5     | 41-44 (93%)        | 6.04           | 0.01      |
| <b>8</b> (2) | 1     | <b>48-49 (97%)</b> | 3.30           | 1.23      |
|              | 2     | 47-49 (93%)        | 4.99           | 0.00      |
|              | 3     | 46-49 (98%)        | 5.43           | 0.16      |

|             |   |                            |      |      |
|-------------|---|----------------------------|------|------|
|             | 4 | 45-49 (97%)                | 5.53 | 0.00 |
|             | 5 | 48-50 (98%)                | 5.56 | 0.09 |
| <b>8(3)</b> | 1 | <b>55-56 (97%)</b>         | 2.69 | 1.63 |
|             | 2 | 54-56 (95%)                | 4.23 | 0.06 |
|             | 3 | 55-57 (95%)                | 4.97 | 0.01 |
|             | 4 | 55-58 (65%)                | 5.52 | 0.00 |
|             | 5 | 55-59 (75%)                | 6.58 | 0.00 |
| <b>8(4)</b> | 1 | <b>62-63 (96%)</b>         | 2.59 | 2.15 |
|             | 2 | 61-63 (96%)                | 3.98 | 0.00 |
|             | 3 | 62-64 (97%)                | 4.59 | 0.09 |
|             | 4 | 60-63 (95%)                | 4.83 | 0.15 |
|             | 5 | 62-65 (69%)<br>62-67 (15%) | 5.52 | 0.00 |
| <b>8(5)</b> | 1 | <b>69-70 (96%)</b>         | 2.18 | 2.54 |
|             | 2 | 68-70 (92%)                | 3.56 | 0.04 |
|             | 3 | 69-71 (93%)                | 4.12 | 0.00 |
|             | 4 | 67-70 (95%)                | 4.65 | 0.16 |
|             | 5 | 69-70 (93%)                | 5.18 | 0.28 |
| <b>8(6)</b> | 1 | <b>76-77 (94%)</b>         | 2.15 | 3.06 |
|             | 2 | 75-77 (95%)                | 3.35 | 0.00 |
|             | 3 | 76-78 (96%)                | 3.86 | 0.10 |
|             | 4 | 74-77 (94%)                | 4.35 | 0.11 |
|             | 5 | 75-78 (89%)                | 4.89 | 0.12 |

### 7.3 B2PLYP/def2-TZVP/def2-TZVP/C

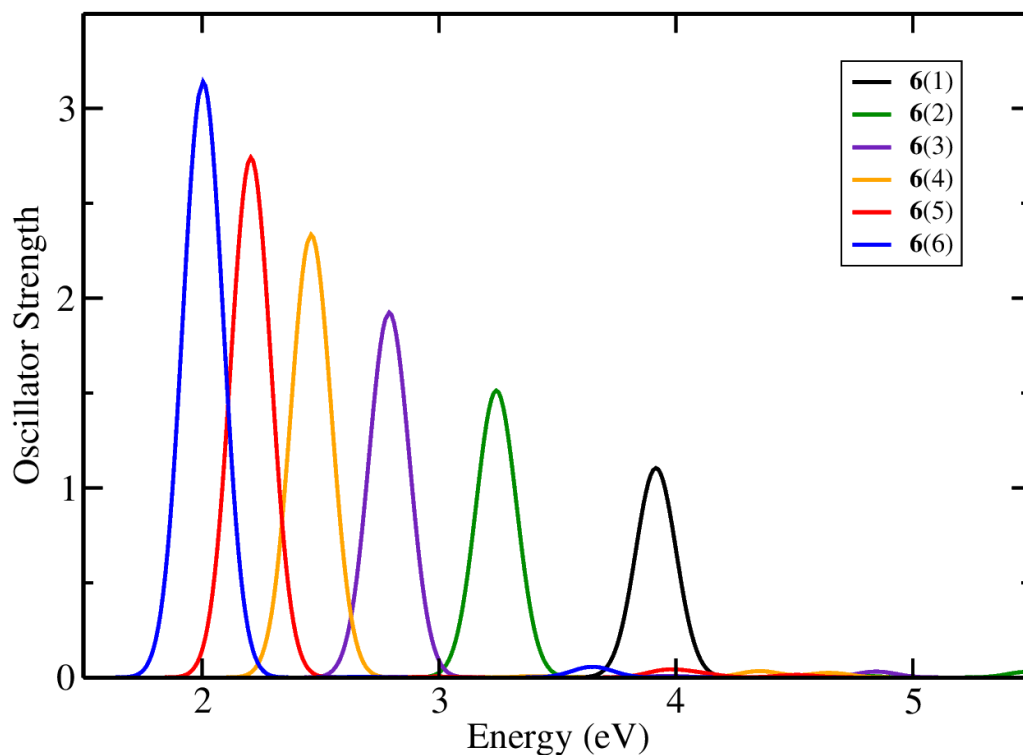

Figure S12: Theoretical absorbance spectra for molecules **6**(n) with n=1 to 6 in gas-phase at TD-DFT/B2PLYP/def2-TZVP/def2-TZVP/C

Table S10: Vertical excitation transitions (eV), main orbitals electronic transitions and oscillator strength ( $f_{osc}$ ) for molecules **6**(n) with n=1 to 6 in gas phase at TD-DFT/B2PLYP/def2-TZVP/def2-TZVP/C level. The main orbitals involved in the first excitation of each molecule are its HOMO and LUMO.

|             | State | Transition (>10%)  | $E_{exc}$ (eV) | $f_{osc}$ |
|-------------|-------|--------------------|----------------|-----------|
| <b>6(1)</b> | 1     | <b>25-26 (98%)</b> | 3.92           | 1.10      |
|             | 2     | 24-26 (97%)        | 6.04           | 0.01      |
|             | 3     | 25-30 (95%)        | 6.62           | 0.00      |
|             | 4     | 25-27 (97%)        | 6.24           | 0.03      |
|             | 5     | 25-28 (92%)        | 6.64           | 0.00      |
| <b>6(2)</b> | 1     | <b>32-33 (97%)</b> | 3.24           | 1.51      |
|             | 2     | 31-33 (93%)        | 4.76           | 0.01      |
|             | 3     | 32-34 (92%)        | 5.48           | 0.03      |

|             |   |                            |      |      |
|-------------|---|----------------------------|------|------|
|             | 4 | 32-37 (94%)                | 6.25 | 0.00 |
|             | 5 | 32-35 (89%)                | 6.23 | 0.00 |
| <b>6(3)</b> | 1 | <b>39-40 (97%)</b>         | 2.79 | 1.92 |
|             | 2 | 38-40 (90%)                | 3.97 | 0.01 |
|             | 3 | 39-41 (89%)                | 4.85 | 0.03 |
|             | 4 | 39-44 (92%)                | 6.02 | 0.00 |
|             | 5 | 39-42 (79%)                | 5.97 | 0.00 |
| <b>6(4)</b> | 1 | <b>46-47 (96%)</b>         | 2.46 | 2.33 |
|             | 2 | 45-47 (88%)                | 3.41 | 0.00 |
|             | 3 | 46-48 (87%)                | 4.35 | 0.03 |
|             | 4 | 44-47 (94%)                | 4.65 | 0.02 |
|             | 5 | 46-52 (89%)                | 5.86 | 0.00 |
| <b>6(5)</b> | 1 | <b>53-54 (96%)</b>         | 2.21 | 2.74 |
|             | 2 | 52-54 (87%)                | 2.99 | 0.00 |
|             | 3 | 53-55 (86%)                | 3.96 | 0.04 |
|             | 4 | 51-54 (93%)                | 4.10 | 0.02 |
|             | 5 | 53-56 (56%)<br>52-55 (35%) | 4.51 | 0.01 |
| <b>6(6)</b> | 1 | <b>60-61 (95%)</b>         | 2.00 | 3.14 |
|             | 2 | 59-61 (86%)                | 2.68 | 0.00 |
|             | 3 | 60-62 (86%)                | 3.64 | 0.04 |
|             | 4 | 58-61 (92%)                | 3.67 | 0.01 |
|             | 5 | 59-62 (69%)<br>60-63 (22%) | 4.05 | 0.00 |



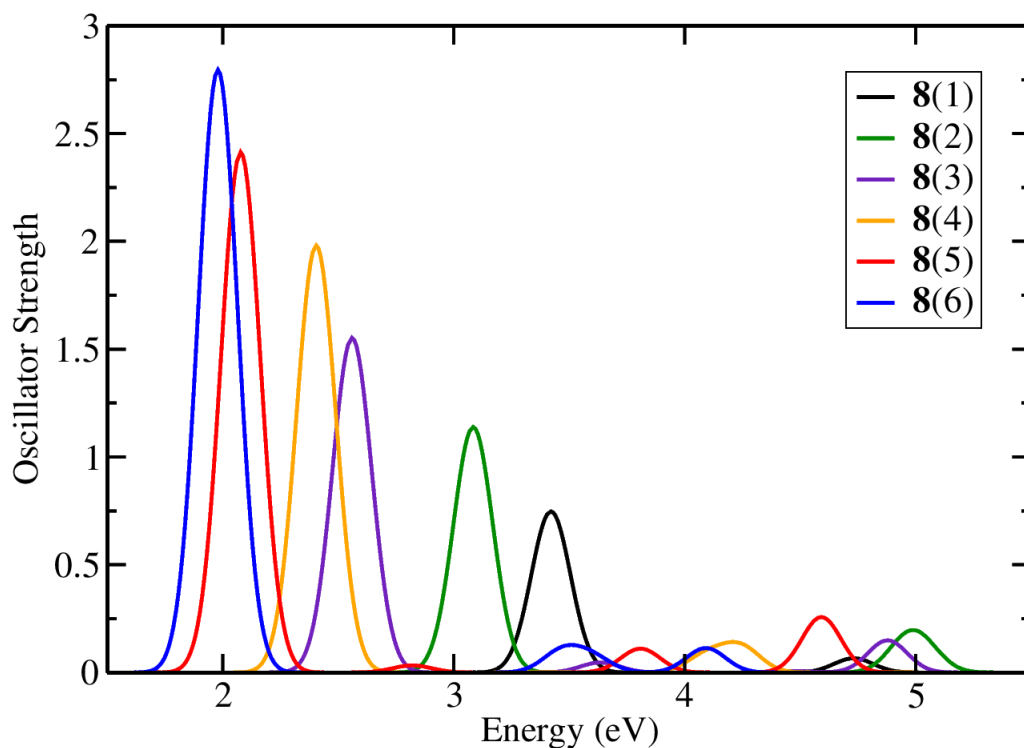

Figure S13: Theoretical absorbance spectra for molecules **8**(n) with n=1 to 6 in gas-phase at TD-DFT/B2PLYP/def2-TZVP/def2-TZVP/C

Table S11: Vertical excitation transitions (eV), main orbitals electronic transitions and oscillator strength ( $f_{osc}$ ) for molecules **8**(n) with n=1 to 6 in gas phase at TD-DFT/B2PLYP/def2-TZVP/def2-TZVP/C level. The main orbitals involved in the first excitation of each molecule are its HOMO and LUMO.

|             | State | Transition (>10%)  | $E_{exc}$ (eV) | $f_{osc}$ |
|-------------|-------|--------------------|----------------|-----------|
| <b>8(1)</b> | 1     | <b>40-41 (98%)</b> | 3.42           | 0.75      |
|             | 2     | 39-41 (98%)        | 4.73           | 0.7       |
|             | 3     | 38-41 (97%)        | 5.36           | 0.09      |
|             | 4     | 40-42 (94%)        | 6.12           | 0.00      |
|             | 5     | 40-43 (90%)        | 6.13           | 0.00      |
| <b>8(2)</b> | 1     | <b>47-48 (97%)</b> | 3.08           | 1.14      |
|             | 2     | 46-48 (97%)        | 4.48           | 0.01      |
|             | 3     | 47-49 (98%)        | 5.04           | 0.08      |
|             | 4     | 45-48 (97%)        | 4.96           | 0.13      |

|             |   |                    |      |      |
|-------------|---|--------------------|------|------|
|             | 5 | 44-48 (94%)        | 5.16 | 0.00 |
| <b>8(3)</b> | 1 | <b>54-55 (97%)</b> | 2.56 | 1.55 |
|             | 2 | 53-55 (95%)        | 3.63 | 0.05 |
|             | 3 | 54-56 (95%)        | 4.47 | 0.01 |
|             | 4 | 50-55 (96%)        | 4.98 | 0.00 |
|             | 5 | 52-55 (97%)        | 4.88 | 0.15 |
| <b>8(4)</b> | 1 | <b>61-62 (96%)</b> | 2.40 | 1.98 |
|             | 2 | 60-62 (95%)        | 3.34 | 0.00 |
|             | 3 | 61-63 (93%)        | 4.09 | 0.08 |
|             | 4 | 59-62 (96%)        | 4.24 | 0.11 |
|             | 5 | 58-62 (94%)        | 4.92 | 0.00 |
| <b>8(5)</b> | 1 | <b>68-69 (96%)</b> | 2.08 | 2.41 |
|             | 2 | 67-69 (89%)        | 2.82 | 0.03 |
|             | 3 | 68-70 (88%)        | 3.76 | 0.00 |
|             | 4 | 66-69 (95%)        | 3.81 | 0.11 |
|             | 5 | 68-71 (93%)        | 4.59 | 0.26 |
| <b>8(6)</b> | 1 | <b>75-76 (95%)</b> | 1.98 | 2.79 |
|             | 2 | 74-76 (93%)        | 2.67 | 0.00 |
|             | 3 | 75-77 (93%)        | 3.47 | 0.10 |
|             | 4 | 73-76 (95%)        | 3.60 | 0.07 |
|             | 5 | 74-77 (91%)        | 4.09 | 0.11 |

## 7.4 B3LYP/AUG/ATZP

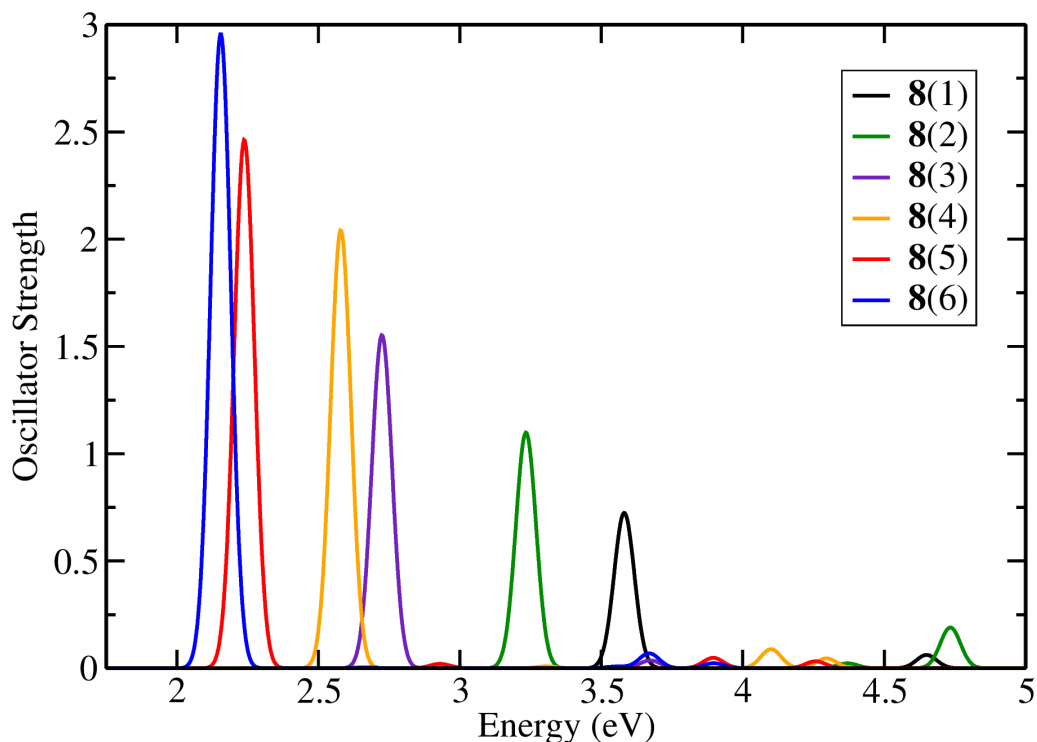

Figure S14: Theoretical absorbance spectra for molecules **8**(n) with n=1 to 6 in gas-phase at TD-DFT/B3LYP/AUG/ATZP

Table S12: Vertical excitation transitions (eV), main orbitals electronic transitions and oscillator strength ( $f_{osc}$ ) for molecules **8**(n) with n=1 to 6 in gas phase at TD-DFT/B3LYP/AUG/ATZP level. The main orbitals involved in the first excitation of each molecule are its HOMO and LUMO.

|              | State | Transition (>10%) | $E_{exc}$ (eV) | $f_{osc}$ |
|--------------|-------|-------------------|----------------|-----------|
| <b>8</b> (1) | 1     | 41-42 (98%)       | 3.58           | 0.72      |
|              | 2     | 40-42 (96%)       | 4.65           | 0.06      |
|              | 3     | 39-42 (100%)      | 5.01           | 0.00      |
|              | 4     | 41-42 (98%)       | 5.36           | 0.00      |
|              | 5     | 41-44 (99%)       | 5.42           | 0.01      |
| <b>8</b> (2) | 1     | 48-49 (98%)       | 3.23           | 1.1       |
|              | 2     | 47-49 (78%)       | 4.37           | 0.02      |
|              |       | 48-50 (21%)       |                |           |

|             |             |                                           |                    |      |
|-------------|-------------|-------------------------------------------|--------------------|------|
|             | 3           | 46-49 (97%)                               | 4.73               | 0.19 |
|             | 4           | 45-49 (100%)                              | 4.78               | 0.00 |
|             | 5           | 48-50 (76%)<br>47-49 (19%)                | 5.17               | 0.04 |
| <b>8(3)</b> | 1           | <b>55-56 (99%)</b>                        | 2.72               | 1.55 |
|             | 2           | 54-56 (81%)<br>55-57 (18%)                | 3.67               | 0.04 |
|             | 3           | 55-57 (67%)<br>52-56 (19%)<br>54-56 (11%) | 5.54               | 0.00 |
|             | 4           | 51-56 (99%)                               | 4.63               | 0.00 |
|             | 5           | 55-58 (97%)                               | 4.76               | 0.00 |
|             | <b>8(4)</b> | 1                                         | <b>62-63 (99%)</b> | 2.58 |
| 2           |             | 61-63 (72%)<br>62-64 (28%)                | 3.30               | 0.01 |
| 3           |             | 60-63 (94%)                               | 4.10               | 0.01 |
| 4           |             | 62-64 (70%)                               | 4.29               | 0.05 |
| 5           |             | 59-63 (99%)                               | 4.56               | 0.00 |
| <b>8(5)</b> | 1           | <b>69-70 (99%)</b>                        | 2.24               | 2.46 |
|             | 2           | 68-70 (69%)                               | 2.93               | 0.02 |
|             | 3           | 67-70 (85%)                               | 2.89               | 0.04 |
|             | 4           | 69-71 (63%)<br>68-70 (25%)                | 3.90               | 0.00 |
|             | 5           | 69-72 (55%)<br>68-71 (43%)                | 4.25               | 0.03 |

|             |             |                    |      |      |
|-------------|-------------|--------------------|------|------|
| <b>8(6)</b> | 1           | <b>76-77 (99%)</b> | 2.15 | 2.96 |
|             | 2           | 75-77 (68%)        | 2.67 | 0.00 |
|             |             | 76-78 (31%)        |      |      |
|             | 3           | 74-77 (82%)        | 3.55 | 0.01 |
|             |             | 75-78 (15%)        |      |      |
|             | 4           | 76-78 (67%)        | 3.67 | 0.07 |
| 75-77 (30%) |             |                    |      |      |
| 5           | 75-78 (56%) | 3.90               | 0.02 |      |
|             | 76-79 (36%) |                    |      |      |

## 7.5 $\omega$ B97X/AUG/ATZP

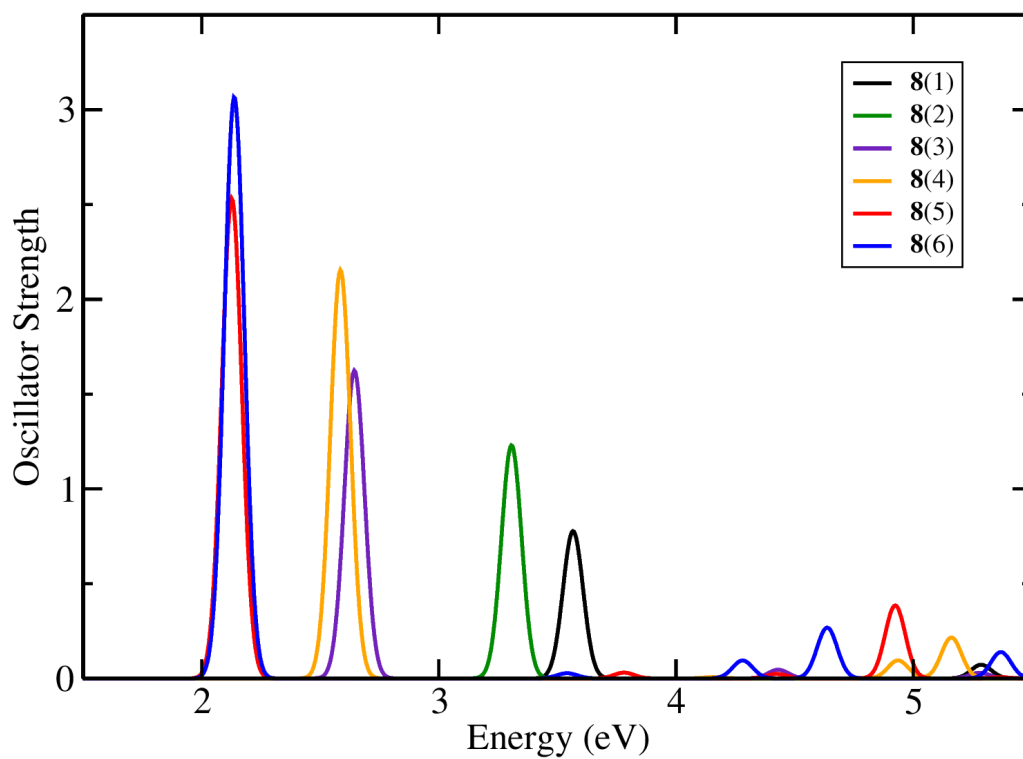

Figure S15: Theoretical absorbance spectra for molecules **8(n)** with n=1 to 6 in gas-phase at TD-DFT/ $\omega$ B97X/AUG/ATZP

Table S13: Vertical excitation transitions (eV), main orbitals electronic transitions and oscillator strength ( $f_{osc}$ ) for molecules **8**(n) with n=1 to 6 in gas phase at TD-DFT/ $\omega$ B97X/AUG/ATZP level. The main orbitals involved in the first excitation of each molecule are its HOMO and LUMO.

|             | State       | Transition (>10%)  | $E_{exc}$ (eV) | $f_{osc}$ |
|-------------|-------------|--------------------|----------------|-----------|
| <b>8(1)</b> | 1           | <b>41-42 (97%)</b> | 3.57           | 0.78      |
|             | 2           | 40-42 (95%)        | 5.29           | 0.07      |
|             | 3           | 39-42 (97%)        | 5.73           | 0.00      |
|             | 4           | 41-43 (70%)        | 6.33           | 0.00      |
|             | 5           | 41-44 (75%)        | 6.58           | 0.01      |
| <b>8(2)</b> | 1           | <b>48-49 (95%)</b> | 3.30           | 1.23      |
|             | 2           | 47-49 (83%)        | 5.14           | 0.00      |
|             |             | 48-50 (11%)        |                |           |
|             | 3           | 46-49 (93%)        | 5.80           | 0.16      |
|             | 4           | 48-50 (84%)        | 5.93           | 0.11      |
| 47-49 (11%) |             |                    |                |           |
| 5           | 45-49 (92%) | 5.95               | 0.00           |           |
| <b>8(3)</b> | 1           | <b>55-56 (95%)</b> | 2.64           | 1.62      |
|             | 2           | 54-56 (90%)        | 4.43           | 0.05      |
|             | 3           | 55-57 (92%)        | 5.28           | 0.03      |
|             | 4           | 55-58 (61%)        | 5.80           | 0.00      |
|             |             | 55-61 (15%)        |                |           |
| 5           | 55-59 (68%) | 6.06               | 0.00           |           |
| <b>8(4)</b> | 1           | <b>62-63 (93%)</b> | 2.58           | 2.15      |
|             | 2           | 61-63 (83%)        | 4.16           | 0.01      |
|             | 3           | 62-64 (84%)        | 4.94           | 0.09      |
|             | 4           | 60-63 (86%)        | 5.16           | 0.22      |
|             | 5           | 62-65 (64%)        | 5.82           | 0.00      |

|             |             |                    |      |      |
|-------------|-------------|--------------------|------|------|
| <b>8(5)</b> | 1           | <b>69-70 (93%)</b> | 2.13 | 2.53 |
|             | 2           | 68-70 (87%)        | 3.78 | 0.03 |
|             | 3           | 69-71 (89%)        | 4.42 | 0.02 |
|             | 4           | 67-70 (78%)        | 4.92 | 0.38 |
|             | 5           | 66-70 (82%)        | 5.37 | 0.01 |
| <b>8(6)</b> | 1           | <b>76-77 (90%)</b> | 2.13 | 3.07 |
|             | 2           | 75-77 (80%)        | 3.54 | 0.03 |
|             |             | 76-78 (12%)        |      |      |
|             | 3           | 76-78 (80%)        | 4.28 | 0.09 |
|             |             | 75-77 (11%)        |      |      |
| 4           | 74-77 (76%) | 4.64               | 0.27 |      |
|             | 75-78 (12%) |                    |      |      |
| 5           | 76-82 (39%) | 5.37               | 0.14 |      |
|             | 75-78 (37%) |                    |      |      |
|             | 74-77 (11%) |                    |      |      |

## 8 Vertical TD-DFT excitation and main orbitals electronic transitions for molecules 1-8(n) in gas phase at B3LYP/TZP level

Table S14: Vertical excitation transitions (eV), main orbitals electronic transitions and oscillator strength ( $f_{osc}$ ) for molecules 1-8(n) in gas phase at TD-DFT/B3LYP/TZP level. The main orbitals involved in the first excitation of each molecule are its HOMO and LUMO.

|             | State         | Transition (>10%)    | $E_{exc}$ (eV) | $f_{osc}$ |
|-------------|---------------|----------------------|----------------|-----------|
| <b>1(3)</b> | 1             | <b>201-202 (96%)</b> | 1.46           | 3.17      |
|             | 2             | 201-203 (58%)        | 1.93           | 0.01      |
|             |               | 200-202 (41%)        |                |           |
|             | 3             | 200-202 (52%)        | 2.33           | 0.02      |
|             |               | 201-203 (35%)        |                |           |
|             | 4             | 201-204 (90%)        | 2.39           | 0.06      |
| 5           | 199-202 (67%) | 2.79                 | 0.00           |           |
|             | 200-203 (30%) |                      |                |           |
| <b>2(1)</b> | 1             | <b>175-176 (96%)</b> | 1.58           | 1.96      |
|             | 2             | 175-177 (85%)        | 2.15           | 0.04      |
|             |               | 174-176 (13%)        |                |           |
|             | 3             | 175-178 (93%)        | 2.56           | 0.17      |
|             | 4             | 174-176 (81%)        | 2.62           | 0.13      |
|             |               | 175-177 (10%)        |                |           |
| 5           | 173-176 (92%) | 3.10                 | 0.86           |           |
| <b>2(2)</b> | 1             | <b>182-183 (96%)</b> | 1.55           | 1.61      |
|             | 2             | 182-184 (71%)        | 2.08           | 0.00      |
|             |               | 181-183 (29%)        |                |           |



|             |   |                                                 |      |      |
|-------------|---|-------------------------------------------------|------|------|
|             | 3 | 181-183 (65%)<br>182-184 (24%)                  | 2.47 | 0.34 |
|             | 4 | 182-185 (92%)                                   | 2.56 | 0.19 |
|             | 5 | 182-186 (53%)<br>181-184 (17%)<br>180-183 (14%) | 3.00 | 0.45 |
| <b>2(3)</b> | 1 | <b>189-190 (96%)</b>                            | 1.47 | 3.16 |
|             | 2 | 189-191 (70%)<br>188-190 (29%)                  | 1.93 | 0.01 |
|             | 3 | 189-192 (91%)                                   | 2.36 | 0.13 |
|             | 4 | 188-190 (61%)<br>189-191 (23%)                  | 2.38 | 0.07 |
|             | 5 | 187-190 (62%)<br>188-191 (35%)                  | 2.84 | 0.00 |
| <b>2(4)</b> | 1 | <b>196-197 (96%)</b>                            | 1.43 | 2.73 |
|             | 2 | 196-198 (57%)<br>195-197 (43%)                  | 1.84 | 0.00 |
|             | 3 | 195-197 (50%)<br>196-198 (35%)<br>196-200 (11%) | 2.26 | 0.32 |
|             | 4 | 196-199 (89%)                                   | 2.37 | 0.16 |
|             | 5 | 195-198 (65%)<br>194-197 (32%)                  | 2.64 | 0.02 |
|             |   |                                                 |      |      |
| <b>2(5)</b> | 1 | <b>203-204 (96%)</b>                            | 1.34 | 4.26 |
|             | 2 | 203-205 (58%)<br>202-204 (42%)                  | 1.72 | 0.01 |
|             | 3 | 203-206 (88%)                                   | 2.18 | 0.06 |

|             |             |                                                 |                      |      |
|-------------|-------------|-------------------------------------------------|----------------------|------|
|             | 4           | 202-204 (48%)<br>203-205 (33%)<br>203-207 (15%) | 2.20                 | 0.06 |
|             | 5           | 201-204 (56%)<br>202-205 (41%)                  | 2.50                 | 0.01 |
| <b>2(6)</b> | 1           | <b>210-211 (96%)</b>                            | 1.31                 | 3.82 |
|             | 2           | 209-211 (51%)<br>210-212 (48%)                  | 1.64                 | 0.00 |
|             | 3           | 210-212 (43%)<br>209-211 (41%)<br>210-214 (10%) | 2.11                 | 0.28 |
|             | 4           | 210-213 (84%)                                   | 2.20                 | 0.07 |
|             | 5           | 209-212 (58%)<br>208-211 (39%)                  | 2.34                 | 0.00 |
|             | <b>2(7)</b> | 1                                               | <b>217-218 (96%)</b> | 1.23 |
| 2           |             | 217-219 (50%)<br>216-218 (49%)                  | 1.55                 | 0.00 |
| 3           |             | 217-220 (83%)<br>215-218 (12%)                  | 2.02                 | 0.01 |
| 4           |             | 216-218 (41%)<br>217-219 (40%)<br>217-221 (14%) | 2.07                 | 0.05 |
| 5           |             | 215-218 (52%)<br>216-219 (43%)                  | 2.22                 | 0.01 |
| <b>2(8)</b> | 1           | <b>224-225 (96%)</b>                            | 1.21                 | 4.91 |
|             | 2           | 223-225 (56%)<br>224-226 (43%)                  | 1.48                 | 0.00 |

|             |   |                                                 |      |      |
|-------------|---|-------------------------------------------------|------|------|
|             | 3 | 224-226 (48%)<br>223-225 (37%)                  | 1.99 | 0.23 |
|             | 4 | 224-227 (78%)<br>223-226 (12%)                  | 2.05 | 0.02 |
|             | 5 | 223-226 (52%)<br>222-225 (45%)                  | 2.09 | 0.00 |
| <b>3(1)</b> | 1 | <b>167-168 (96%)</b>                            | 1.59 | 1.98 |
|             | 2 | 167-169 (88%)<br>166-168 (11%)                  | 2.14 | 0.04 |
|             | 3 | 167-170 (93%)                                   | 2.55 | 0.21 |
|             | 4 | 166-168 (81%)                                   | 2.70 | 0.16 |
|             | 5 | 165-168 (54%)<br>167-171 (23%)<br>164-168 (15%) | 3.15 | 0.10 |
| <b>3(2)</b> | 1 | 174-175 (96%)                                   | 1.58 | 1.61 |
|             | 2 | 174-176 (64%)<br>173-175 (35%)                  | 2.10 | 0.00 |
|             | 3 | 173-175 (58%)<br>174-176 (29%)<br>174-178 (11%) | 2.48 | 0.38 |
|             | 4 | 174-177 (93%)                                   | 2.57 | 0.22 |
|             | 5 | 173-176 (72%)<br>172-175 (18%)                  | 3.03 | 0.02 |
|             |   |                                                 |      |      |
| <b>3(3)</b> | 1 | <b>181-182 (96%)</b>                            | 1.47 | 3.19 |
|             | 2 | 181-183 (74%)<br>180-182 (25%)                  | 1.92 | 0.02 |
|             | 3 | 181-184 (92%)                                   | 2.34 | 0.16 |

|             |             |                                                 |                      |      |
|-------------|-------------|-------------------------------------------------|----------------------|------|
|             | 4           | 180-182 (64%)<br>181-183 (18%)<br>181-185 (14%) | 2.40                 | 0.09 |
|             | 5           | 179-182 (67%)<br>180-183 (31%)                  | 2.87                 | 0.00 |
| <b>3(4)</b> | 1           | <b>188-189 (96%)</b>                            | 1.45                 | 2.75 |
|             | 2           | 188-190 (52%)<br>187-189 (48%)                  | 1.87                 | 0.00 |
|             | 3           | 187-189 (44%)<br>188-190 (40%)<br>188-192 (12%) | 2.28                 | 0.36 |
|             | 4           | 188-191 (90%)                                   | 2.39                 | 0.16 |
|             | 5           | 187-190 (72%)<br>186-189 (24%)                  | 2.66                 | 0.02 |
|             | <b>4(1)</b> | 1                                               | <b>135-136 (98%)</b> | 1.71 |
| 2           |             | 134-136 (58%)<br>135-137 (41%)                  | 2.31                 | 0.00 |
| 3           |             | 135-137 (51%)<br>134-136 (35%)                  | 2.72                 | 0.07 |
| 4           |             | 133-136 (78%)<br>131-136 (12%)                  | 2.95                 | 0.03 |
| 5           |             | 131-136 (66%)<br>135-138 (23%)                  | 3.10                 | 0.07 |
| <b>4(2)</b> | 1           | <b>142-143 (98%)</b>                            | 1.68                 | 2.86 |
|             | 2           | 141-143 (57%)<br>142-144 (43%)                  | 2.17                 | 0.00 |

|             |   |                                                 |      |      |
|-------------|---|-------------------------------------------------|------|------|
|             | 3 | 142-144 (51%)<br>141-143 (37%)                  | 2.69 | 0.02 |
|             | 4 | 140-143 (81%)                                   | 2.92 | 0.01 |
|             | 5 | 141-144 (62%)<br>142-145 (34%)                  | 3.07 | 0.00 |
| <b>4(3)</b> | 1 | <b>149-150 (97%)</b>                            | 1.53 | 3.17 |
|             | 2 | 148-150 (55%)<br>149-151 (45%)                  | 1.99 | 0.00 |
|             | 3 | 149-151 (50%)<br>148-150 (40%)                  | 2.53 | 0.06 |
|             | 4 | 147-150 (68%)<br>149-152 (31%)                  | 2.64 | 0.00 |
|             | 5 | 148-151 (41%)<br>149-152 (39%)<br>147-150 (16%) | 2.82 | 0.00 |
| <b>4(4)</b> | 1 | <b>156-157 (98%)</b>                            | 1.51 | 3.95 |
|             | 2 | 155-157 (57%)<br>156-158 (42%)                  | 1.89 | 0.00 |
|             | 3 | 156-158 (53%)<br>155-157 (38%)                  | 2.50 | 0.03 |
|             | 4 | 154-157 (73%)<br>155-158 (17%)                  | 2.62 | 0.00 |
|             | 5 | 156-159 (49%)<br>155-158 (47%)                  | 2.67 | 0.00 |
| <b>5(1)</b> | 1 | <b>168-169 (96%)</b>                            | 1.67 | 2.08 |
|             | 2 | 168-170 (83%)<br>167-169 (16%)                  | 2.24 | 0.03 |

|             |             |                                                 |                      |      |
|-------------|-------------|-------------------------------------------------|----------------------|------|
|             | 3           | 167-169 (79%)<br>168-170 (13%)                  | 2.67                 | 0.13 |
|             | 4           | 168-171 (92%)                                   | 2.68                 | 0.21 |
|             | 5           | 166-169 (91%)                                   | 3.14                 | 0.15 |
| <b>5(2)</b> | 1           | <b>175-176 (96%)</b>                            | 1.55                 | 1.67 |
|             | 2           | 175-177 (78%)<br>174-176 (21%)                  | 2.09                 | 0.02 |
|             | 3           | 174-176 (69%)<br>175-177 (16%)<br>175-179 (10%) | 2.53                 | 0.30 |
|             | 4           | 175-178 (90%)                                   | 2.55                 | 0.20 |
|             | 5           | 175-179 (75%)<br>172-176 (10%)                  | 2.99                 | 0.07 |
|             | <b>5(3)</b> | 1                                               | <b>182-183 (96%)</b> | 1.51 |
| 2           |             | 182-184 (66%)<br>181-183 (33%)                  | 1.98                 | 0.01 |
| 3           |             | 181-183 (58%)<br>182-184 (27%)<br>182-186 (12%) | 2.40                 | 0.07 |
| 4           |             | 182-185 (92%)                                   | 2.43                 | 0.14 |
| 5           |             | 181-184 (50%)<br>180-183 (48%)                  | 2.88                 | 0.00 |
| <b>5(4)</b> |             | 1                                               | <b>189-190 (96%)</b> | 1.42 |
|             | 2           | 189-191 (63%)<br>188-190 (37%)                  | 1.85                 | 0.00 |

|             |             |                                                 |      |      |
|-------------|-------------|-------------------------------------------------|------|------|
|             | 3           | 188-190 (54%)<br>189-191 (29%)<br>189-193 (13%) | 2.29 | 0.30 |
|             | 4           | 189-192 (89%)                                   | 2.35 | 0.16 |
|             | 5           | 188-191 (54%)<br>187-190 (44%)                  | 2.68 | 0.01 |
| <b>6(1)</b> | 1           | <b>26-27 (99%)</b>                              | 4.15 | 1.16 |
|             | 2           | 25-27 (56%)                                     | 5.85 | 0.02 |
|             |             | 26-28 (43%)                                     |      |      |
|             | 3           | 26-29 (96%)                                     | 5.89 | 0.00 |
|             | 4           | 26-30 (99%)                                     | 5.94 | 0.00 |
| 5           | 26-31 (96%) | 5.98                                            | 0.00 |      |

|             |             |                    |      |      |
|-------------|-------------|--------------------|------|------|
| <b>6(2)</b> | 1           | <b>33-34 (99%)</b> | 3.47 | 1.59 |
|             | 2           | 32-34 (63%)        | 4.75 | 0.01 |
|             |             | 33-35 (36%)        |      |      |
|             | 3           | 33-36 (95%)        | 5.44 | 0.00 |
|             | 4           | 33-37 (98%)        | 5.46 | 0.00 |
|             | 5           | 33-38 (96%)        | 5.53 | 0.00 |
| <b>6(3)</b> | 1           | <b>40-41 (99%)</b> | 3.00 | 2.03 |
|             | 2           | 39-41 (65%)        | 4.00 | 0.01 |
|             |             | 40-42 (35%)        |      |      |
|             | 3           | 40-42 (64%)        | 5.10 | 0.01 |
|             |             | 39-41 (34%)        |      |      |
|             | 4           | 40-44 (62%)        | 5.14 | 0.00 |
| 40-43 (34%) |             |                    |      |      |
| 5           | 40-43 (63%) | 5.15               | 0.00 |      |
|             | 40-44 (34%) |                    |      |      |
| <b>6(4)</b> | 1           | <b>47-48 (99%)</b> | 2.67 | 2.47 |
|             | 2           | 46-48 (65%)        | 3.47 | 0.00 |
|             |             | 47-49 (35%)        |      |      |
|             | 3           | 47-49 (64%)        | 4.59 | 0.01 |
|             |             | 46-48 (34%)        |      |      |
|             | 4           | 45-48 (80%)        | 4.69 | 0.00 |
| 46-49 (13%) |             |                    |      |      |
| 5           | 47-51 (73%) | 4.93               | 0.00 |      |
|             | 47-52 (23%) |                    |      |      |
| <b>6(5)</b> | 1           | <b>54-55 (99%)</b> | 2.40 | 2.92 |
|             | 2           | 53-55 (64%)        | 3.06 | 0.00 |
| 54-56 (35%) |             |                    |      |      |



|             |   |                            |      |      |
|-------------|---|----------------------------|------|------|
|             | 3 | 52-55 (78%)<br>53-56 (17%) | 4.17 | 0.00 |
|             | 4 | 54-56 (63%)<br>53-55 (34%) | 4.18 | 0.02 |
|             | 5 | 54-57 (53%)<br>53-56 (44%) | 4.42 | 0.00 |
| <b>6(6)</b> | 1 | <b>61-62 (99%)</b>         | 2.20 | 3.35 |
|             | 2 | 60-62 (64%)<br>61-62 (36%) | 2.75 | 0.00 |
|             | 3 | 59-62 (76%)<br>60-63 (19%) | 3.75 | 0.00 |
|             | 4 | 61-63 (63%)<br>60-62 (35%) | 3.85 | 0.02 |
|             | 5 | 61-64 (52%)<br>60-63 (44%) | 4.00 | 0.00 |
| <b>7(1)</b> | 1 | <b>33.34 (98%)</b>         | 3.71 | 0.83 |
|             | 2 | 33-36 (99%)                | 5.41 | 0.00 |
|             | 3 | 33-35 (99%)                | 5.42 | 0.00 |
|             | 4 | 32-34 (71%)<br>33-37 (27%) | 5.65 | 0.03 |
|             | 5 | 33-38 (99%)                | 5.98 | 0.00 |
| <b>7(2)</b> | 1 | <b>40-41 (99%)</b>         | 3.43 | 1.35 |
|             | 2 | 39-41 (84%)<br>40-42 (15%) | 4.42 | 0.02 |
|             | 3 | 40-43 (97%)                | 5.40 | 0.00 |
|             | 4 | 40-44 (97%)                | 5.43 | 0.00 |

|             |   |                                           |      |      |
|-------------|---|-------------------------------------------|------|------|
|             | 5 | 40-42 (80%)<br>39-41 (13%)                | 5.45 | 0.00 |
| <b>7(3)</b> | 1 | <b>47-48 (99%)</b>                        | 2.79 | 1.68 |
|             | 2 | 46-48 (61%)<br>47-49 (39%)                | 3.92 | 0.02 |
|             | 3 | 47-50 (90%)                               | 4.90 | 0.00 |
|             | 4 | 47-51 (87%)                               | 4.90 | 0.00 |
|             | 5 | 45-48 (70%)<br>47-52 (14%)                | 4.91 | 0.06 |
| <b>7(4)</b> | 1 | <b>54-55 (99%)</b>                        | 2.67 | 2.22 |
|             | 2 | 53-55 (76%)<br>54-56 (23%)                | 3.35 | 0.01 |
|             | 3 | 54-56 (74%)<br>53-55 (22%)                | 4.46 | 0.01 |
|             | 4 | 52-55 (66%)<br>53-56 (33%)                | 4.65 | 0.00 |
|             | 5 | 54-59 (45%)<br>53-56 (38%)<br>52-55 (15%) | 4.89 | 0.00 |
| <b>7(5)</b> | 1 | <b>61-62 (99%)</b>                        | 2.28 | 2.59 |
|             | 2 | 60-62 (61%)<br>61-63 (38%)                | 3.02 | 0.01 |
|             | 3 | 59-62 (85%)<br>61-64 (11%)                | 3.93 | 0.04 |
|             | 4 | 61-63 (61%)<br>60-62 (37%)                | 4.08 | 0.00 |

|             |   |                                           |      |      |
|-------------|---|-------------------------------------------|------|------|
|             | 5 | 61-64 (55%)<br>60-63 (41%)                | 4.34 | 0.05 |
| <b>7(6)</b> | 1 | <b>68-69 (99%)</b>                        | 2.21 | 3.09 |
|             | 2 | 67-69 (72%)<br>68-70 (28%)                | 2.70 | 0.00 |
|             | 3 | 66-69 (59%)<br>67-70 (40%)                | 3.75 | 0.02 |
|             | 4 | 68-70 (71%)<br>67-69 (27%)                | 3.78 | 0.03 |
|             | 5 | 68-71 (47%)<br>67-70 (32%)<br>66-69 (20%) | 3.99 | 0.00 |
| <b>8(1)</b> | 1 | <b>41-42 (98%)</b>                        | 3.60 | 0.74 |
|             | 2 | 40-42 (96%)                               | 4.66 | 0.06 |
|             | 3 | 39-42 (100%)                              | 5.01 | 0.00 |
|             | 4 | 41-44 (96%)                               | 5.52 | 0.00 |
|             | 5 | 41-43 (99%)                               | 5.53 | 0.00 |
| <b>8(2)</b> | 1 | <b>48-49 (98%)</b>                        | 3.25 | 1.11 |
|             | 2 | 47-49 (79%)<br>48-50 (20%)                | 4.38 | 0.02 |
|             | 3 | 46-49 (97%)                               | 4.72 | 0.19 |
|             | 4 | 45-49 (100%)                              | 4.75 | 0.00 |
|             | 5 | 48-50 (77%)<br>47-49 (18%)                | 5.24 | 0.04 |
| <b>8(3)</b> | 1 | <b>55-56 (99%)</b>                        | 2.74 | 1.57 |
|             | 2 | 54-56 (81%)<br>55-57 (18%)                | 3.68 | 0.04 |

|             |   |                                           |      |      |
|-------------|---|-------------------------------------------|------|------|
|             | 3 | 55-57 (65%)<br>52-56 (23%)<br>54-56 (11%) | 4.58 | 0.00 |
|             | 4 | 51-56 (99%)                               | 4.63 | 0.00 |
|             | 5 | 53-56 (85%)<br>55-60 (12%)                | 4.87 | 0.08 |
| <b>8(4)</b> | 1 | <b>62-53 (99%)</b>                        | 2.56 | 2.06 |
|             | 2 | 61-63 (72%)<br>62-64 (28%)                | 3.31 | 0.01 |
|             | 3 | 60-63 (94%)                               | 4.09 | 0.09 |
|             | 4 | 62-64 (70%)<br>61-63 (26%)                | 4.33 | 0.04 |
|             | 5 | 59-63 (100%)                              | 4.54 | 0.00 |
| <b>8(5)</b> | 1 | <b>69-70 (99%)</b>                        | 2.25 | 2.47 |
|             | 2 | 68-70 (69%)<br>69-70 (30%)                | 2.94 | 0.02 |
|             | 3 | 67-70 (85%)                               | 3.89 | 0.04 |
|             | 4 | 69-71 (62%)<br>68-70 (25%)<br>66-70 (11%) | 3.92 | 0.00 |
|             | 5 | 69-72 (53%)<br>68-71 (45%)                | 4.27 | 0.03 |
| <b>8(6)</b> | 1 | <b>76-77 (99%)</b>                        | 2.16 | 2.97 |
|             | 2 | 75-77 (68%)<br>76-78 (32%)                | 2.67 | 0.00 |
|             | 3 | 74-77 (81%)<br>75-78 (16%)                | 3.55 | 0.00 |

|  |   |                            |      |      |
|--|---|----------------------------|------|------|
|  | 4 | 76-78 (67%)<br>75-77 (30%) | 3.69 | 0.07 |
|  | 5 | 75-78 (56%)<br>76-79 (36%) | 3.90 | 0.02 |
